# Supplementary material for: A novel polyoxometalate-functionalized mesoporous hybrid silica: synthesis and characterization
Source: Royal Society of Chemistry journal article supplement (doi:10.1039/b800025e), 2008-01-01
Supplement: b800025e.pdf [file b800025e.pdf]

## Supporting Information

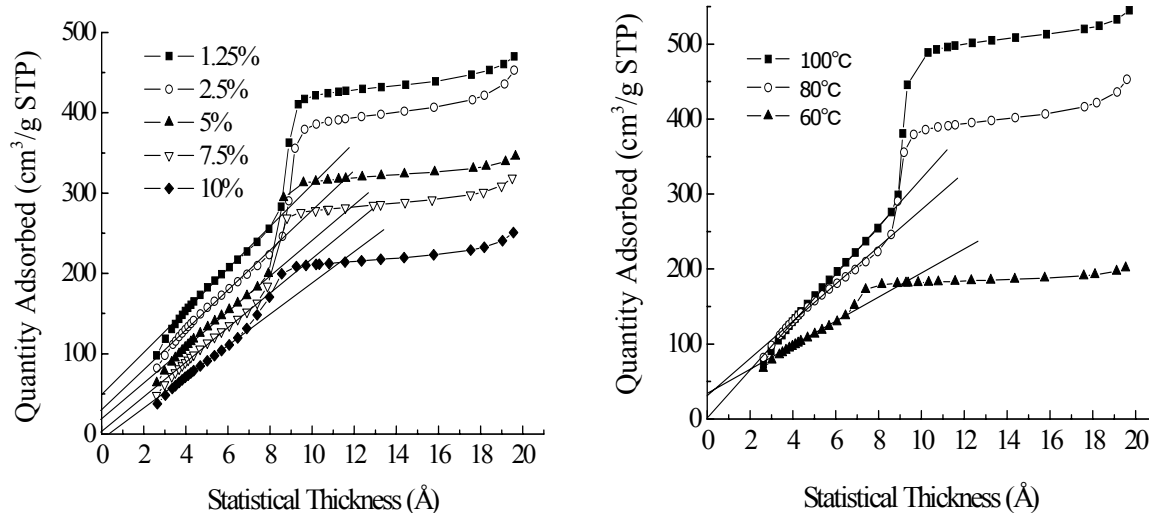

**Fig. S1** *t*-plot of the hybrid samples synthesized with different initial SiW<sub>11</sub> concentrations (left, aged at 80°C) and different aging temperatures (right, 5% of initial SiW<sub>11</sub> concentration). The prehydrolysis time for all the samples was 2 h.

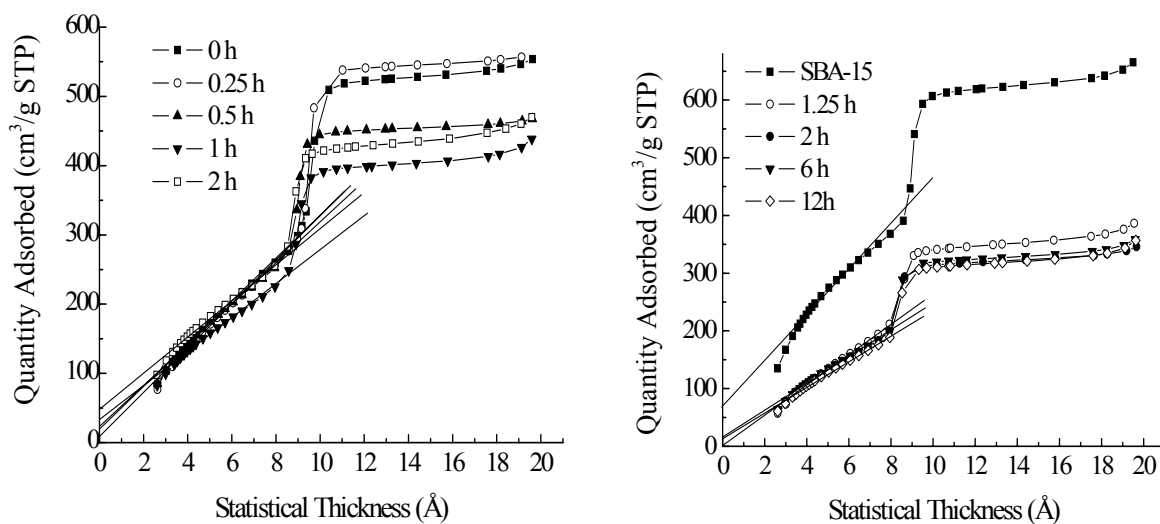

**Fig. S2** *t*-plot of 1.25%SiW<sub>11</sub>/MHS (left) and 5%SiW<sub>11</sub>/MHS (right, except pure SBA-15) synthesized using different prehydrolysis time. All of the samples were aged at 80°C.

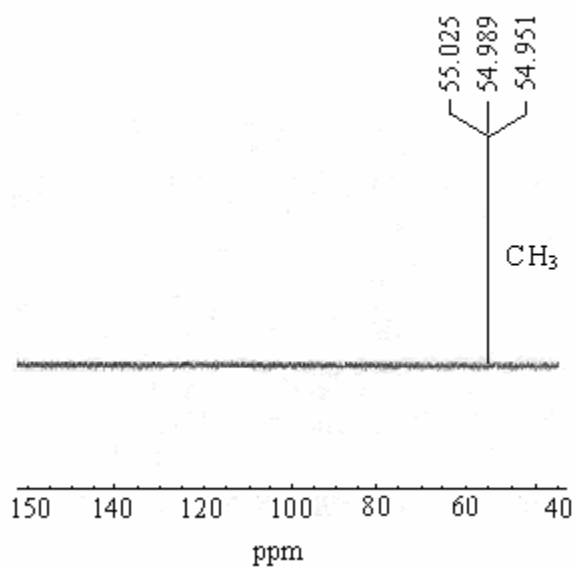

**Fig. S3** DEPT 135 spectra of SiW<sub>11</sub>Si<sub>2</sub> (TMA salt)

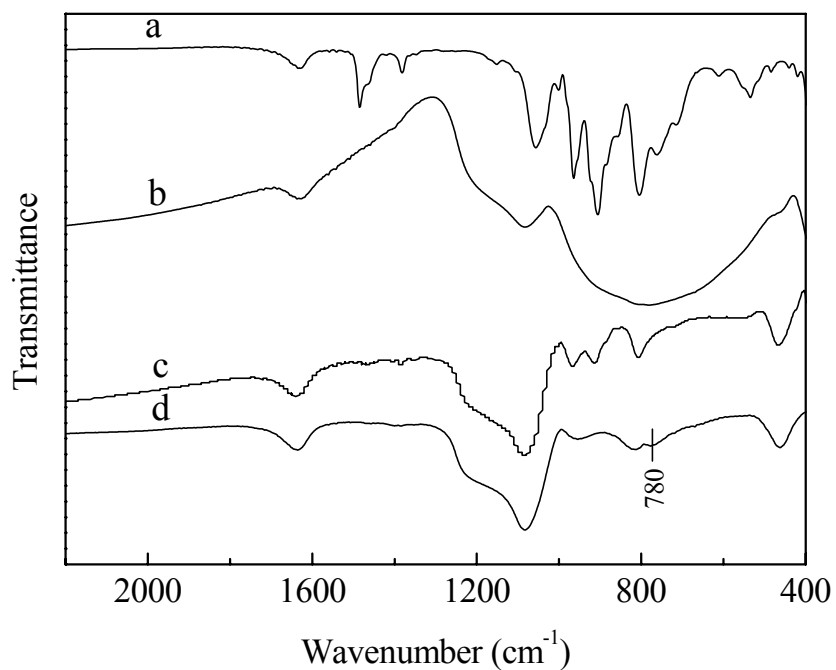

**Fig. S4** IR spectra of (a) SiW<sub>11</sub>Si<sub>2</sub> (TBA salt) before calcined at 500°C, (b) calcining (a) at 500°C, (c) 5%SiW<sub>11</sub>/MHS before calcined at 500°C, and (d) calcining (c) at 500°C. Aging temperature and prehydrolysis time for (c) were 80°C and 2 h, respectively.

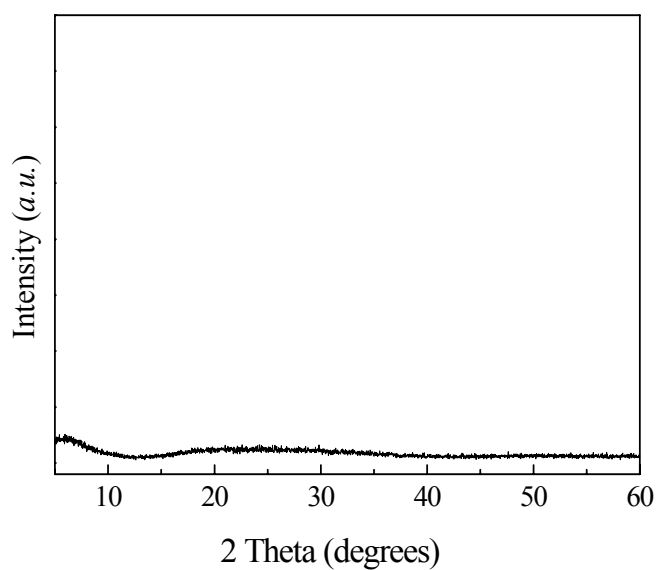

**Fig. S5** Broad-angle XRD pattern of 10%SiW<sub>11</sub>/MHS synthesized using prehydrolysis time of 2 h and aged at 80°C.

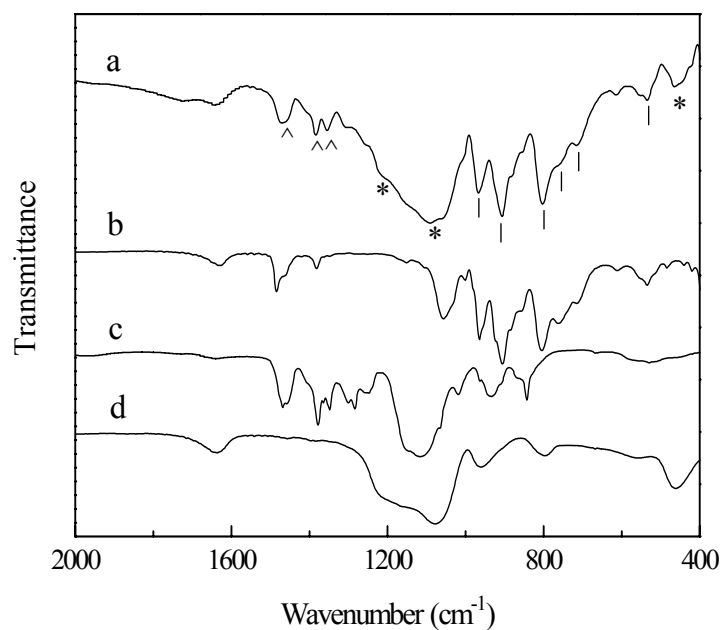

**Fig. S6** IR spectra of (a) viscous solid formed at 0.25 h of prehydrolysis time in the synthesis of 5%SiW<sub>11</sub>/MHS (Peaks for component SiW<sub>11</sub>Si<sub>2</sub> is marked by “|”, for SiO<sub>2</sub> is marked by “\*” and for P123 is marked by “^”), (b) SiW<sub>11</sub>Si<sub>2</sub> (TBA salt), (c) P123, and (d) pure SBA-15.
